# Supplementary material for: Polyphenol-Rich Extract of Fermented Chili Pepper Alleviates Insulin Resistance in HepG2 Cells via Regulating INSR, PTP1B, PPAR-γ, and AMPK Pathways
Source: MDPI journal article supplement (doi:10.3390/fermentation9020084), 2023-01-18
Supplement: s1 [file s1]

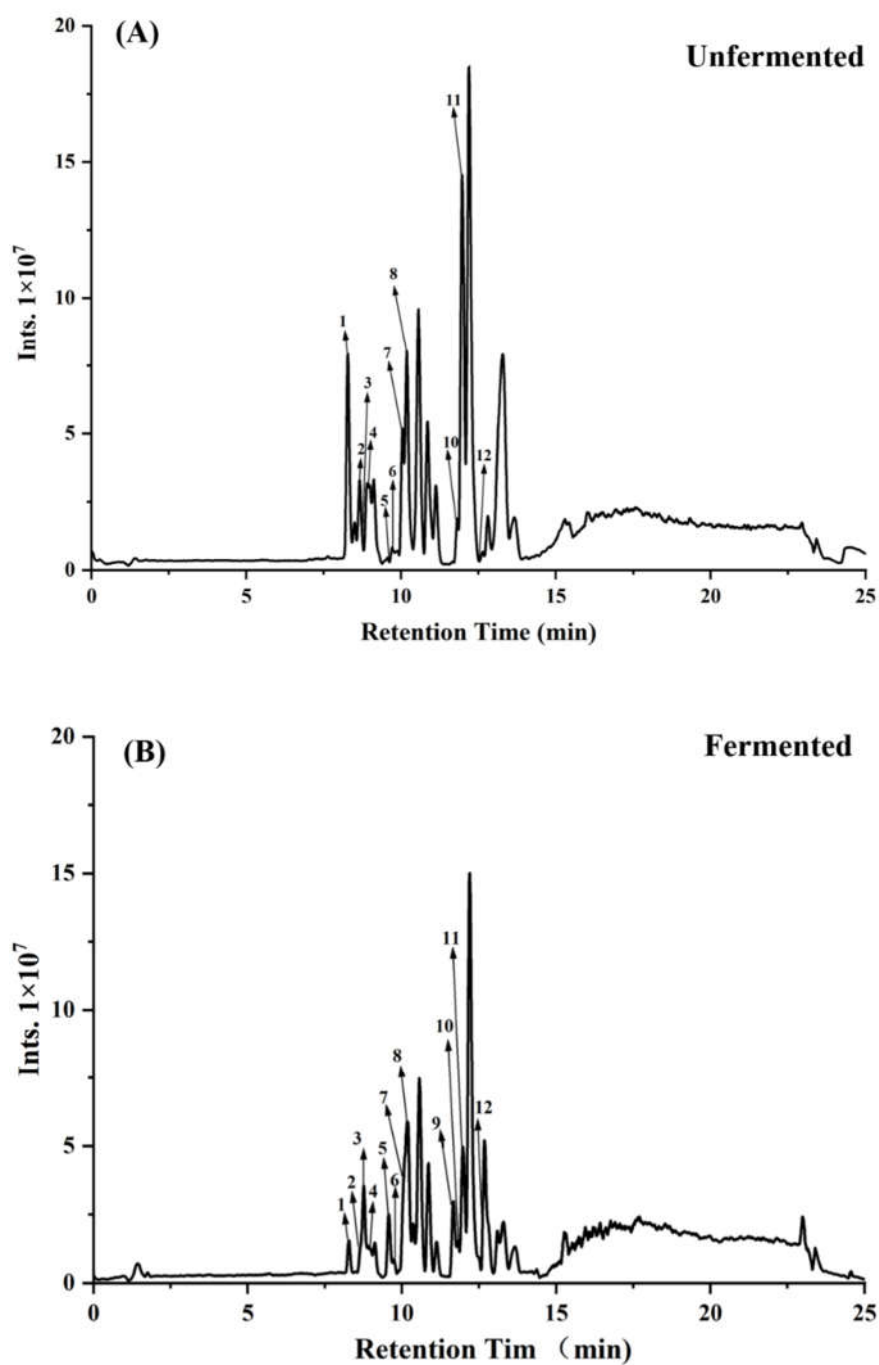

**Figure S1.** The representative chromatograms of (A) non-fermented chili pepper extract and (B) fermented chili pepper extract. The quantity of identified polyphenolic compounds and MS data are shown in Table S1.

**Table S1.** The quantity of identified polyphenolic compounds and MS data of non-fermented chili pepper extract and fermented chili pepper extract.

| Peak No. | Compounds                                     | Rt (min) | [M-H] <sup>-</sup> <i>m/z</i> | Molecular formula                               | MS/MS fragment ions                                                           | Non-fermented chili pepper extract | Fermented chili pepper extract    |
|----------|-----------------------------------------------|----------|-------------------------------|-------------------------------------------------|-------------------------------------------------------------------------------|------------------------------------|-----------------------------------|
| 1        | Chlorogenic acid                              | 8.23     | 353.0879                      | C <sub>16</sub> H <sub>18</sub> O <sub>9</sub>  | 191.0553(100), 135.0441(16.13)                                                | 3553.02 ± 13.56 <sup>1)</sup>      | 752.77 ± 162.37 <sup>*** 1)</sup> |
| 2        | Kaempferol-3- <i>O</i> -rutinoside            | 8.59     | 593.1517                      | C <sub>27</sub> H <sub>30</sub> O <sub>15</sub> | 383.0775(53.69), 353.0669(100)                                                | 149.88 ± 4.44                      | 1095.74 ± 46.70 <sup>***</sup>    |
| 3        | Caffeic acid                                  | 8.73     | 179.0342                      | C <sub>9</sub> H <sub>8</sub> O <sub>4</sub>    | 134.0360(100)                                                                 | 99.01 ± 6.72                       | 1047.54 ± 53.57 <sup>***</sup>    |
| 4        | Isoschaftoside                                | 8.94     | 563.141                       | C <sub>26</sub> H <sub>28</sub> O <sub>14</sub> | 353.0669(100)                                                                 | 614.46 ± 19.30                     | 271.27 ± 51.50 <sup>***</sup>     |
| 5        | Luteolin C-[pentosyl]-glucoside               | 9.56     | 579.1359                      | C <sub>26</sub> H <sub>28</sub> O <sub>15</sub> | 447.0925(1), 327.0506(0.88), 298.0804(0.25), 285.0403(100)                    | 10.55 ± 0.87                       | 137.25 ± 17.51 <sup>***</sup>     |
| 6        | Kaempferol-3- <i>O</i> -glucoside             | 9.75     | 447.0934                      | C <sub>27</sub> H <sub>30</sub> O <sub>15</sub> | 299.0561(100), 284.0362(80.02)                                                | 19.29 ± 0.39                       | 24.00 ± 0.56 <sup>***</sup>       |
| 7        | Luteolin <i>O</i> -(apiosylmalonyl) glucoside | 10.02    | 665.1357                      | C <sub>21</sub> H <sub>20</sub> O <sub>11</sub> | 621.1464(9.86), 579.1340(3), 489.1049(5.61), 285.0400(100)                    | 267.08 ± 5.90                      | 170.15 ± 11.07 <sup>***</sup>     |
| 8        | Isorhamnetin-3- <i>O</i> -glucoside           | 10.19    | 477.1038                      | C <sub>22</sub> H <sub>22</sub> O <sub>12</sub> | 315,285.0394(7.34)163.0025(0.52)                                              | 588.47 ± 25.07                     | 465.15 ± 22.34                    |
| 9        | Luteolin                                      | 11.67    | 285.0406                      | C <sub>15</sub> H <sub>10</sub> O <sub>6</sub>  | 133.0285(100)107.0125(5.65)                                                   | 0.00 ± 0.00                        | 159.17 ± 2.51 <sup>***</sup>      |
| 10       | Capsianoside II                               | 11.82    | 1083.522                      | C <sub>50</sub> H <sub>83</sub> O <sub>25</sub> | 1083.5223(100), 1084.5251(57.91), 921.4693(44.96), 775.4118(32.02)            | 87.25 ± 4.39                       | 60.34 ± 0.25 <sup>***</sup>       |
| 11       | Monomer capsianoside                          | 11.97    | 1169.522                      | C <sub>53</sub> H <sub>86</sub> O <sub>28</sub> | 1083.5219(100), 1065.5117(98.34), 1125.5328(58.69), 1066.5149(56.61)          | 1267.00 ± 21.38                    | 375.10 ± 6.44 <sup>***</sup>      |
| 12       | Apigenin                                      | 12.5     | 269.0456                      | C <sub>15</sub> H <sub>10</sub> O <sub>5</sub>  | 121.0282(3.48), 118.0367(9.42), 117.0334(100), 105.0332(1.50), 107.0126(4.39) | 15.55 ± 0.04                       | 35.26 ± 0.36 <sup>***</sup>       |

<sup>1)</sup> Data are presented as the mean ± SD (*n* =3) in µg/g of dry weight; polyphenolic compounds 1, 2, 3, 4, 6, 8, 9, and 12 were quantified using their relevant standards; polyphenolic compounds 5 and 7 were quantified using luteolin standard; polyphenolic compounds 10 and 11 were quantified using isorhamnetin-3-*O*-glucoside standard.

<sup>11)</sup> Significant differences were determined using Student's t-test, \*\*\* indicates *p* < 0.001.
